# Supplementary material for: Giant conductivity enhancement of ferrite insulators induced by atomic hydrogen
Source: Royal Society of Chemistry journal article supplement (doi:10.1039/c5cp00878f), 2015-01-01

## Supplemental Materials

FIGURE 1. Schematic of the set-up for atomic hydrogen charging with ultrasonic vibration.

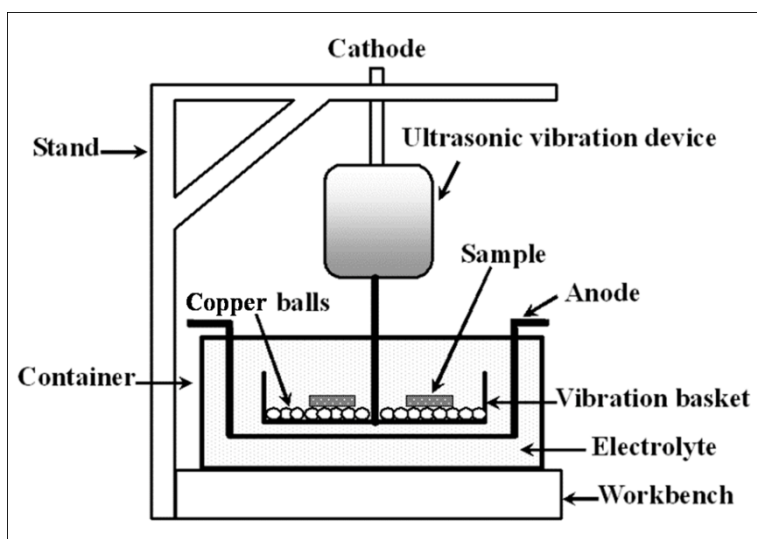

FIGURE 2.  $\theta$ - $2\theta$  XRD patterns of the as-sintered samples, hydrogenated ferrites with and without  $\text{Na}_2\text{EDTA}$  as additive. The diffraction peaks are indexed according to JCPDS file 22-1012.

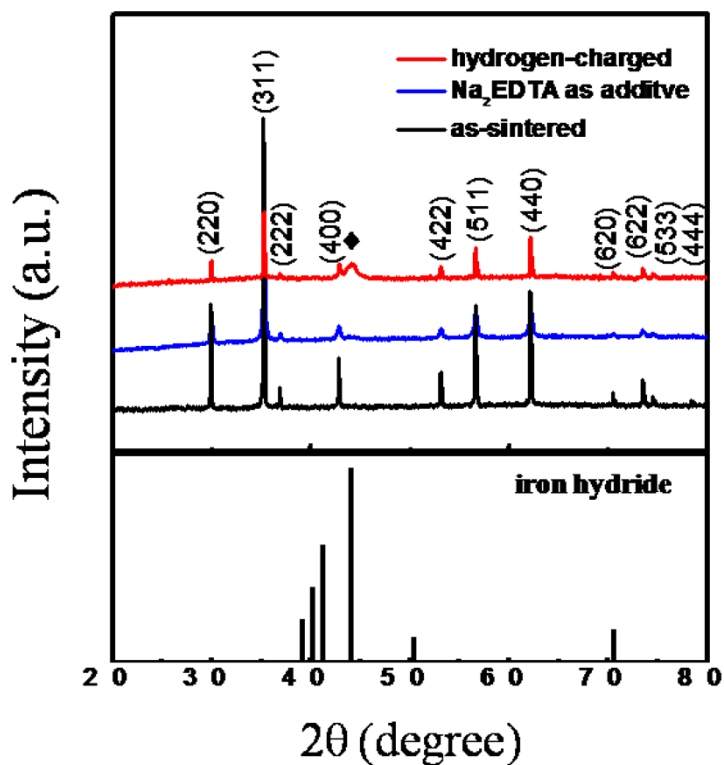

Supplement: c5cp00878f1.pdf [file c5cp00878f1.pdf]
